# Supplementary material for: Higher Synovial Immunohistochemistry Reactivity of IL-17A, Dkk1, and TGF-β1 in Patients with Early Psoriatic Arthritis and Rheumatoid Arthritis Could Predict the Use of Biologics
Source: MDPI journal article supplement (doi:10.3390/biomedicines12040815), 2024-04-08
Supplement: s1 [file s1]

Supplementary Table 1.- The logistic regression analysis of the dependent variable (use of biologics).

| Variables for the use of biologics |        |       |       |    |       |        |                     |        |
|------------------------------------|--------|-------|-------|----|-------|--------|---------------------|--------|
|                                    | B      | ET    | Wald  | gl | Sig.  | Exp(B) | 95,0% IC for Exp(B) |        |
|                                    |        |       |       |    |       |        | Lower               | Upper  |
| Male                               | 2.059  | 0.832 | 6.119 | 1  | 0.013 | 7.840  | 1.534               | 40.076 |
| Age                                | -0.016 | 0.017 | 0.834 | 1  | 0.361 | 0.984  | 0.952               | 1.018  |
| csDMAR                             | 0.900  | 0.739 | 1.484 | 1  | 0.223 | 2.460  | 0.578               | 10.473 |
| D<br>erosive                       | 0.624  | 0.968 | 0.416 | 1  | 0.519 | 1.867  | 0.280               | 12.444 |

Age, sex, baseline use of csDMARDs, and erosive radiographic damage were selected as independent variables.
